# Supplementary material for: Local environment of Fe dopants in nanoscale Fe : CeO2−xoxygen storage material
Source: Royal Society of Chemistry journal article supplement (doi:10.1039/c4nr06060a), 2015-01-01
Supplement: c4nr06060a1.pdf [file c4nr06060a1.pdf]

## Supporting Information

# Local environment of Fe dopants in Nanoscale Fe:CeO<sub>2-x</sub> oxygen storage material.

M. Meledina,<sup>a</sup> S. Turner,<sup>a\*</sup> V. Galvita,<sup>b</sup> H. Poelman,<sup>b</sup> G. B. Marin<sup>b</sup> and G. Van Tendeloo<sup>a</sup>

<sup>a</sup> Electron Microscopy for Materials Science (EMAT), Department of Physics, University of Antwerp, Groenenborgerlaan 171, B-2020 Antwerp, Belgium.

<sup>b</sup> Laboratory for Chemical Technology, Ghent University, Technologiepark 914, B-9052 Gent, Belgium.

## S1. XRD analysis

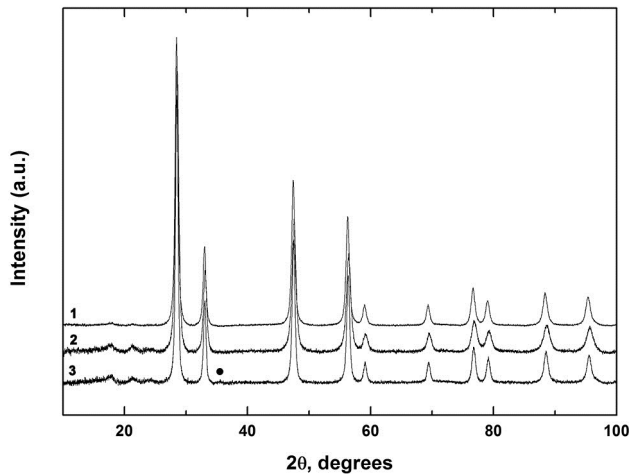

**Fig. S1.** XRD patterns of the undoped ceria (1), 5wt.% Fe: CeO<sub>2-x</sub> (2) and 5wt.% Fe: CeO<sub>2-x</sub> after ten cycles (3) samples. The black circle indicates the position of the (110) α-Fe<sub>2</sub>O<sub>3</sub> peak.

| Sample name                                        | Cell parameter, Å |
|----------------------------------------------------|-------------------|
| Undoped CeO <sub>2-x</sub>                         | 5.4088(4)         |
| 5 wt.% Fe:CeO <sub>2-x</sub>                       | 5.3974(5)         |
| 5 wt % Fe:CeO <sub>2-x</sub> after 10 redox cycles | 5.4019(4)         |

**Table S1.** Cell parameters, calculated by the least squares method from the XRD patterns acquired from undoped ceria, 5wt.% Fe: CeO<sub>2-x</sub> and 5wt.% Fe: CeO<sub>2-x</sub> cycled samples.

## S2. XPS analysis of as prepared Fe:CeO<sub>2-x</sub>

XPS was performed on Fe:CeO<sub>2-x</sub>, as requested. The Fe2p signal was not useable as it covered with Auger peaks from Ce (CeMNN) (figure S2a). Therefore, the weaker signal of Fe3p was investigated, following an analysis of Yamachita<sup>1</sup>(figure S2b). Based on literature, the position of this photoline is at binding energy 55.5 eV for Fe<sup>3+</sup>, while it shifts down to 53-54 eV for

$\text{Fe}^{2+}$ .<sup>2,3</sup> Curve fitting of the  $\text{Fe}3p$  photoline showed that the main contribution originates from  $\text{Fe}^{2+}$ , with a minor signal from  $\text{Fe}^{3+}$ , 86 vs. 14%, respectively.

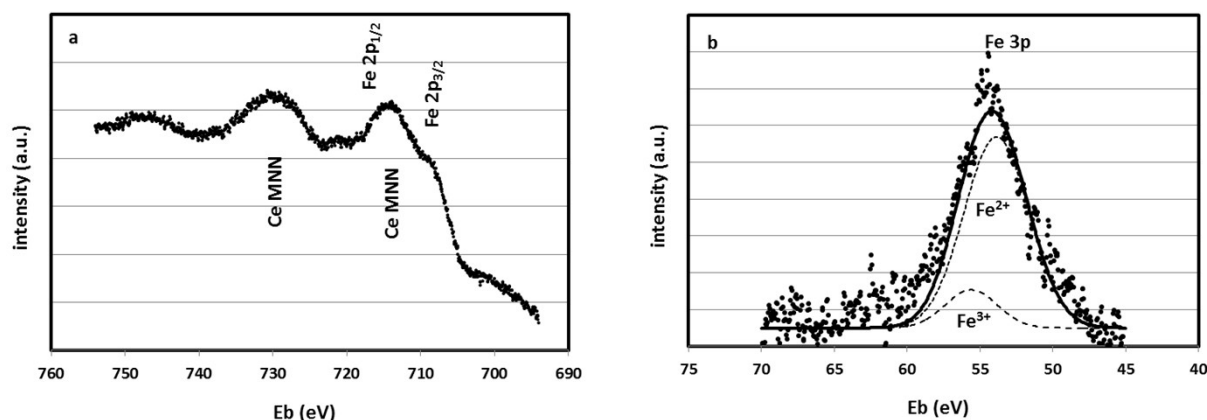

**Figure S2:** XPS on  $\text{Fe}:\text{CeO}_{2-x}$  a: Auger emission lines of Ce MNN, overlapping the photoemission lines of Fe2p; b: Fe3p photoemission line with curve fitting of  $\text{Fe}^{2+}$  (dotted line) and  $\text{Fe}^{3+}$  (dashed line) contribution; sum of fitting contributions (full line).

### S3. TEM analysis after a half redox cycle

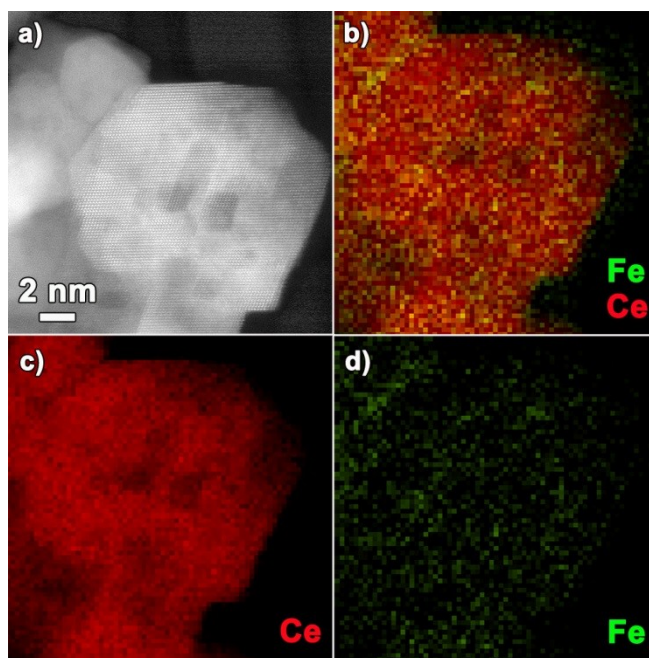

Fig. S3  $\text{Fe}:\text{CeO}_{2-x}$  after a half redox cycle (in reduced state); a) HAADF-STEM image showing the mapped ceria nanoparticle together with b) color overlay of the Ce and Fe, c) Ce, d) Fe EELS maps.

#### S4. TEM analysis after one hundred redox cycles

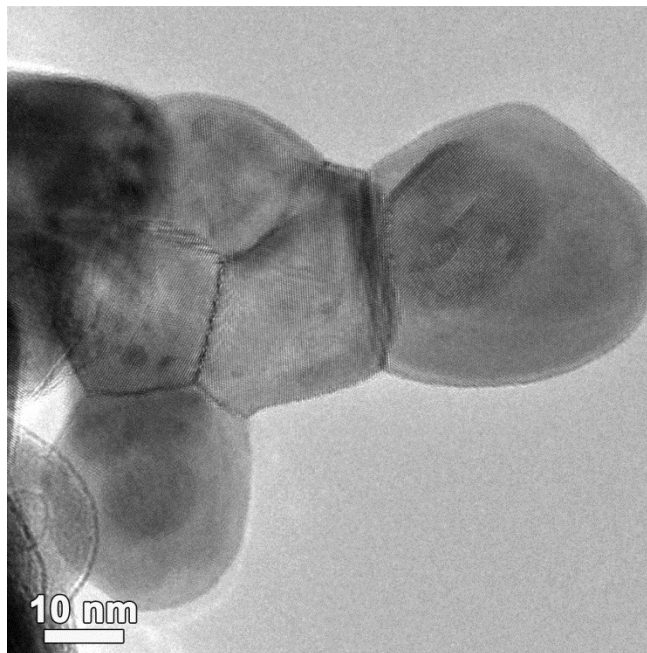

Fig. S4  $Fe:CeO_{2-x}$  after one hundred redox cycles; HRTEM image of sintered ceria nanoparticles.

#### References

1. T. Yamashita, P. Hayes, *Appl. Surf. Sci.*, 2008, 254, 2441–2449.
2. A. Mekki, M. Salim, *J. Electron. Spectrosc. Relat. Phenom.*, 1999, 101–103, 227–232.
3. J. Knudsen, L.R. Merte, L.C. Grabow, F.M. Eichhorn, S. Porsgaard, H. Zeuthen, R.T. Vang, E. Lægsgaard, M. Mavrikakis, F. Besenbacher, *Surf. Sci.*, 2010, 604, 11–20.
